# Supplementary material for: Salen based Schiff bases to flame retard thermoplastic polyurethane mimicking operational strategies of thermosetting resin
Source: Royal Society of Chemistry journal article supplement (doi:10.1039/c5ra06242j), 2015-01-01
Supplement: c5ra06242j1.pdf [file c5ra06242j1.pdf]

## Supplementary data

### Salen based Schiff bases to flame retard thermoplastic polyurethane mimicking operational strategies of thermosetting resin

Anil D. Naik, Gaëlle Fontaine, Séverine Bellayer, and Serge Bourbigot\*

ISP/UMET – UMR/CNRS 8207, Ecole Nationale Supérieure de Chimie de Lille (ENSCL),  
Avenue Dimitri Mendeleïev – Bât. C7a, BP 90108, 59652 Villeneuve d'Ascq Cedex, France.

\*Corresponding author:

Phone: +33 (0)3 20 43 48 88, Fax: +33 (0)3 20 43 65 84

E-mail address: [serge.bourbigot@ensc-lille.fr](mailto:serge.bourbigot@ensc-lille.fr)

**Table S1.** Identification of the pyrolysates from pyGCMS on TPU and L2-TPU in desorption mode.

| Desorption, 10°C/min                 | species                              | m/z | TPU | L2-TPU |
|--------------------------------------|--------------------------------------|-----|-----|--------|
| <b>150-250 °C</b>                    | H <sub>2</sub> O                     | 18  | √   | √      |
|                                      | CO <sub>2</sub>                      | 44  | -   | √      |
|                                      | THF                                  | 72  | √   | √      |
|                                      | 1,4-butanediol                       | 90  | -   | √      |
|                                      | resorcinol                           | 110 | -   | √      |
|                                      | diphenylmethane diamine              | 198 | -   | √      |
|                                      | 1,6-dioxacyclododecane-7,12-dione    | 200 | √   | √      |
|                                      | diphenylmethane diisocyanate         | 250 | √   | √      |
|                                      | 3-butenyl-4-hydroxybutyladipate      | 272 | -   | √      |
| <b>250-300°C</b>                     | CO <sub>2</sub>                      | 44  | -   | √      |
|                                      | THF                                  | 72  | -   | √      |
|                                      | 1,4-butanediol                       | 90  | √   | √      |
|                                      | 1,6-dioxacyclododecane-7,12-dione    | 198 | √   | √      |
|                                      | diphenylmethane diisocyanate         | 250 | √   | √      |
|                                      | 4-hydroxybutyl adipic acid monoester | 218 | √   | √      |
| <b>300-350°C</b>                     | CO <sub>2</sub>                      | 44  | √   | -      |
|                                      | THF                                  | 72  | √   | √      |
|                                      | cyclopentanone                       | 84  | √   | -      |
|                                      | 1,6-dioxacyclododecane-7,12-dione    | 200 | √   | √      |
|                                      | 1,4-butanediol                       | 90  | √   | √      |
|                                      | 4-hydroxybutyl adipic acid monoester | 218 | √   | √      |
|                                      | 3-butenyl adipate                    | 254 | √   | √      |
|                                      | diphenylmethane diisocyanate         | 250 | √   | √      |
|                                      | 3-Butenyl-4-hydroxybutyl adipate     | 272 | √   | √      |
| <b>350-450°C</b>                     | CO <sub>2</sub>                      | 44  | √   | √      |
|                                      | cyclopentanone                       | 84  | √   | √      |
|                                      | 1,4-butane diol                      | 90  | √   | √      |
|                                      | 1,6-dioxacyclododecane-7,12-dione    | 200 | √   | √      |
|                                      | 3-Butenyl-4-hydroxybutyl adipate     | 272 | √   | √      |
|                                      | p-toluidine                          | 107 | -   | √      |
| 4-hydroxybutyl adipic acid monoester | 218                                  | √   | √   |        |

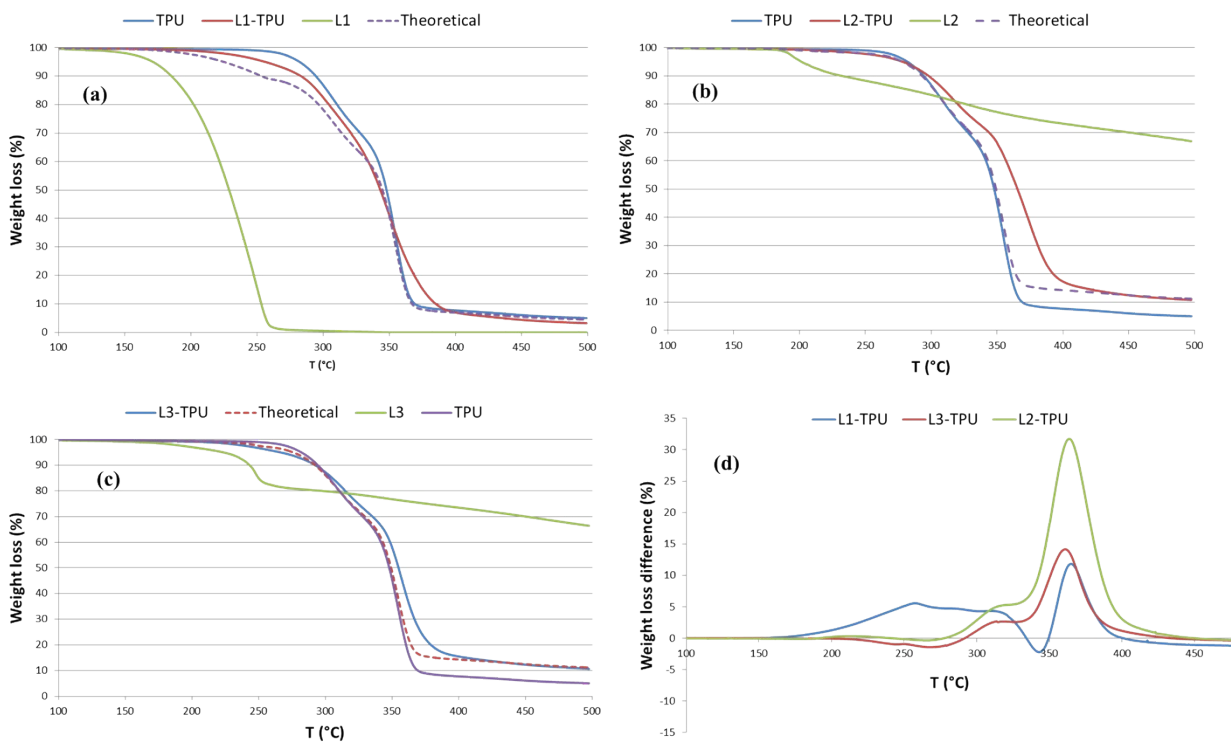

Figure S1. (a-c) Experimental and theoretical TGA profiles of L1-TPU, L2-TPU and L3-TPU respectively. (d) Curves of weight loss difference between theoretical and experimental TGA curves.

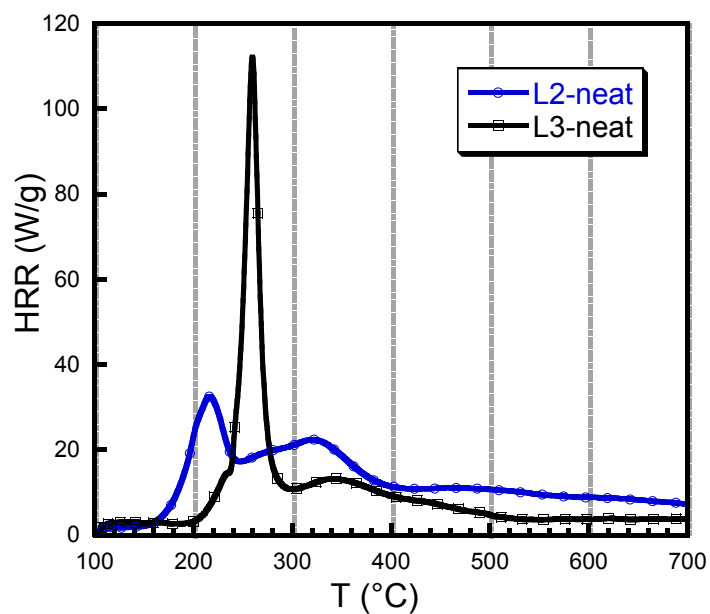

Figure S2. PCFC on neat L2 and L3.

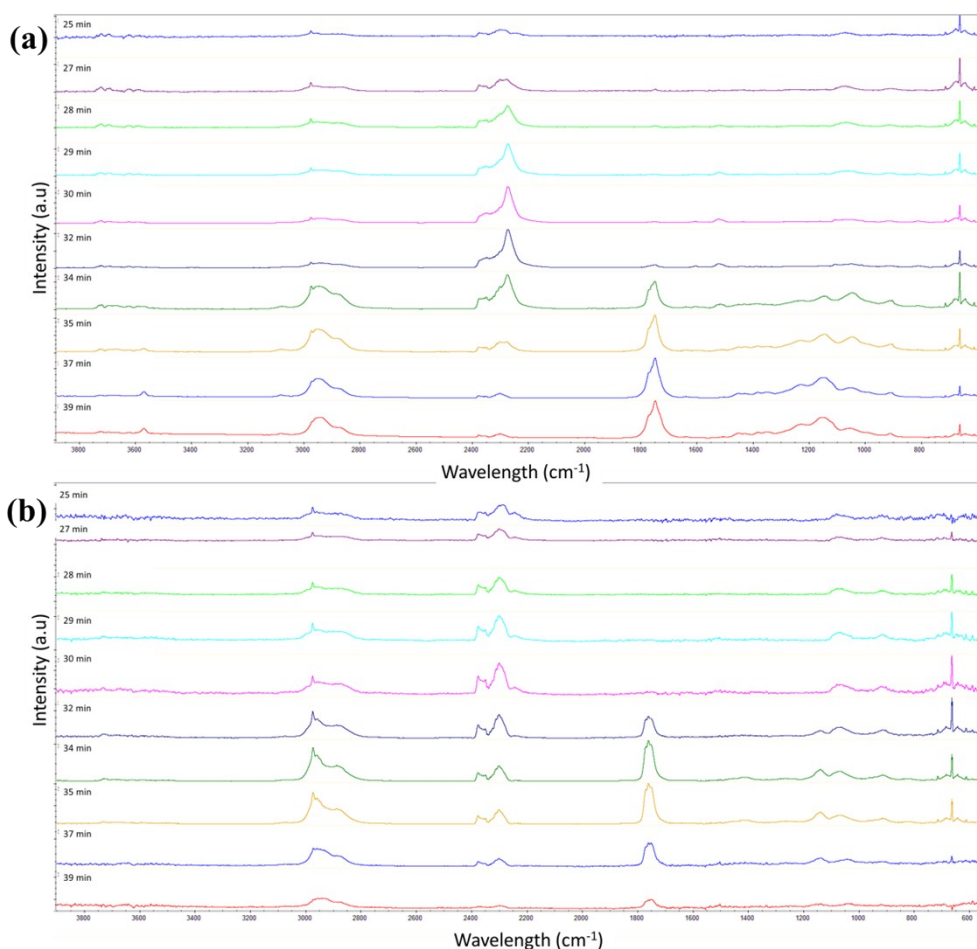

**Figure S3.** Evolution of species in (a) TPU and (b) L2-TPU studied by TGA-FTIR

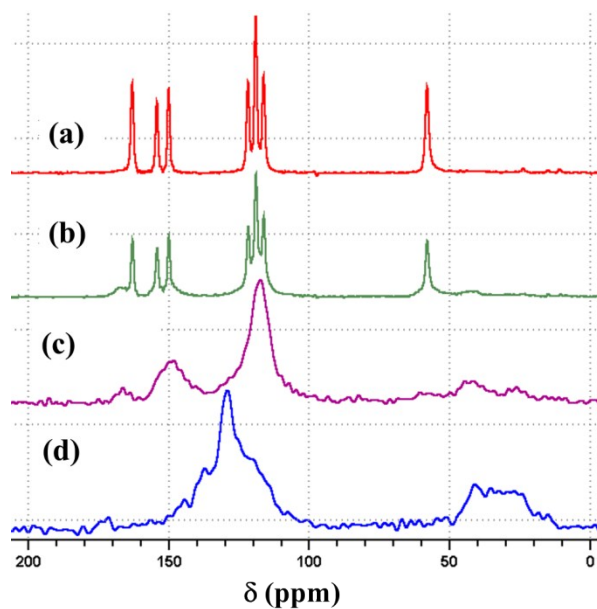

**Figure S4.**  $^{13}\text{C}$  MAS NMR on (a) L3. (b) L3 heated to  $800^\circ\text{C}$  in furnace for 2s (new aromatic signals begin to appear). (c) sample obtained from further heating L3 in an oven until elastic intumescence is formed (d) L3-TPU thermally treated in a similar way until intumescence is formed. Aromatic and aliphatic signals corresponding to resin formation is seen.

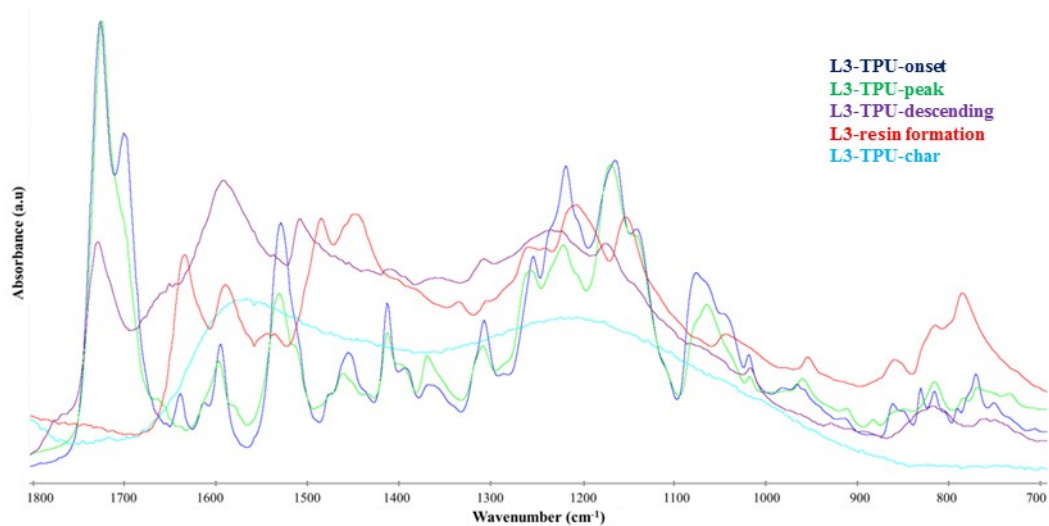

**Figure S5.** Expanded part of FTIR on samples collected from mass loss calorimetry (L3-TPU: onset, peak, descending and char refers to samples collected from mass loss calorimetry based on HRR curve which are at different stages of degradation). L3-resin is also showed for comparison.
